# Supplementary material for: GMAP is an Atg8a-interacting protein that regulates Golgi turnover in Drosophila
Source: PubMed Central journal article supplement (PMC9637997; doi:10.1016/j.celrep.2022.110903), 2022-05-31
Supplement: mmc1.pdf [file mmc1.pdf]

Cell Reports, Volume 39

## Supplemental information

### **GMAP is an Atg8a-interacting protein that regulates Golgi turnover in *Drosophila***

**Ashrafur Rahman, Peter Lőrincz, Raksha Gohel, Anikó Nagy, Gábor Csordás, Yan Zhang, Gábor Juhász, and Ioannis P. Nezis**

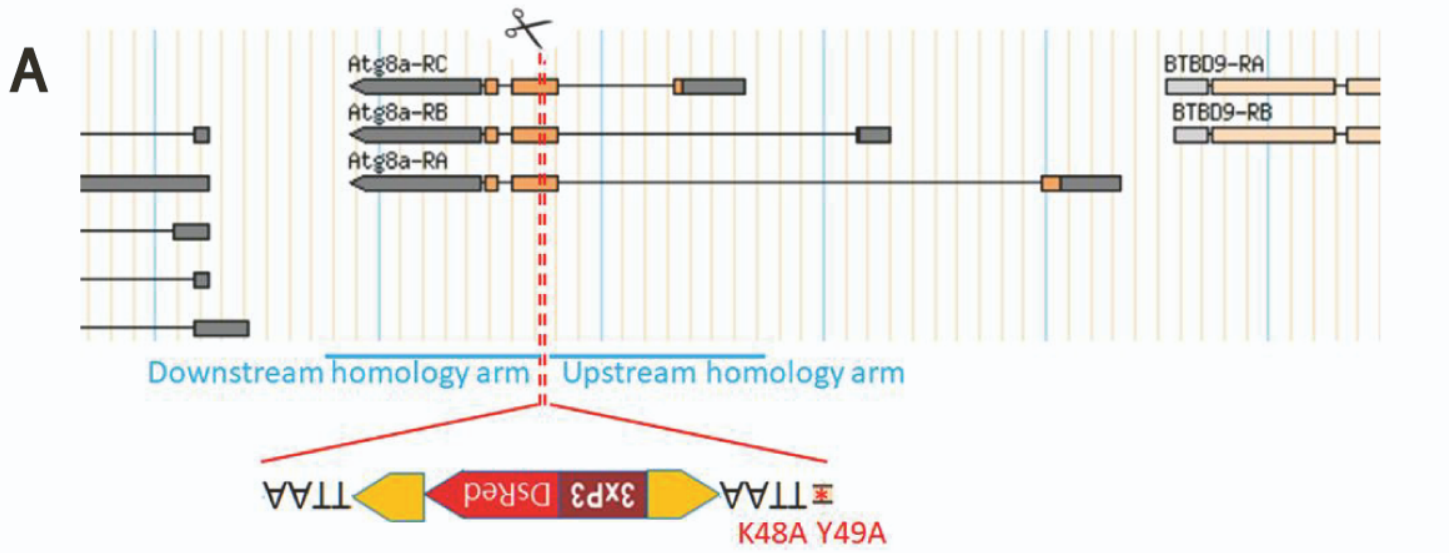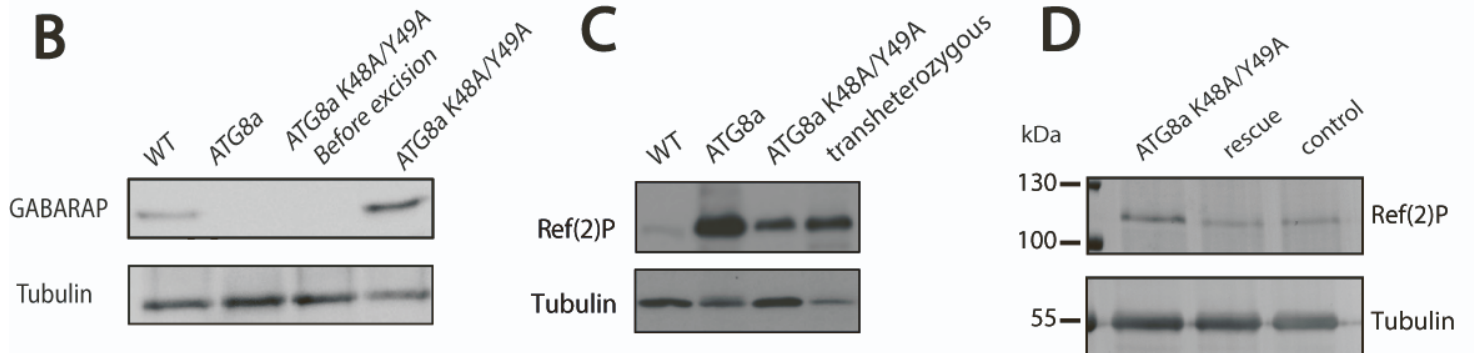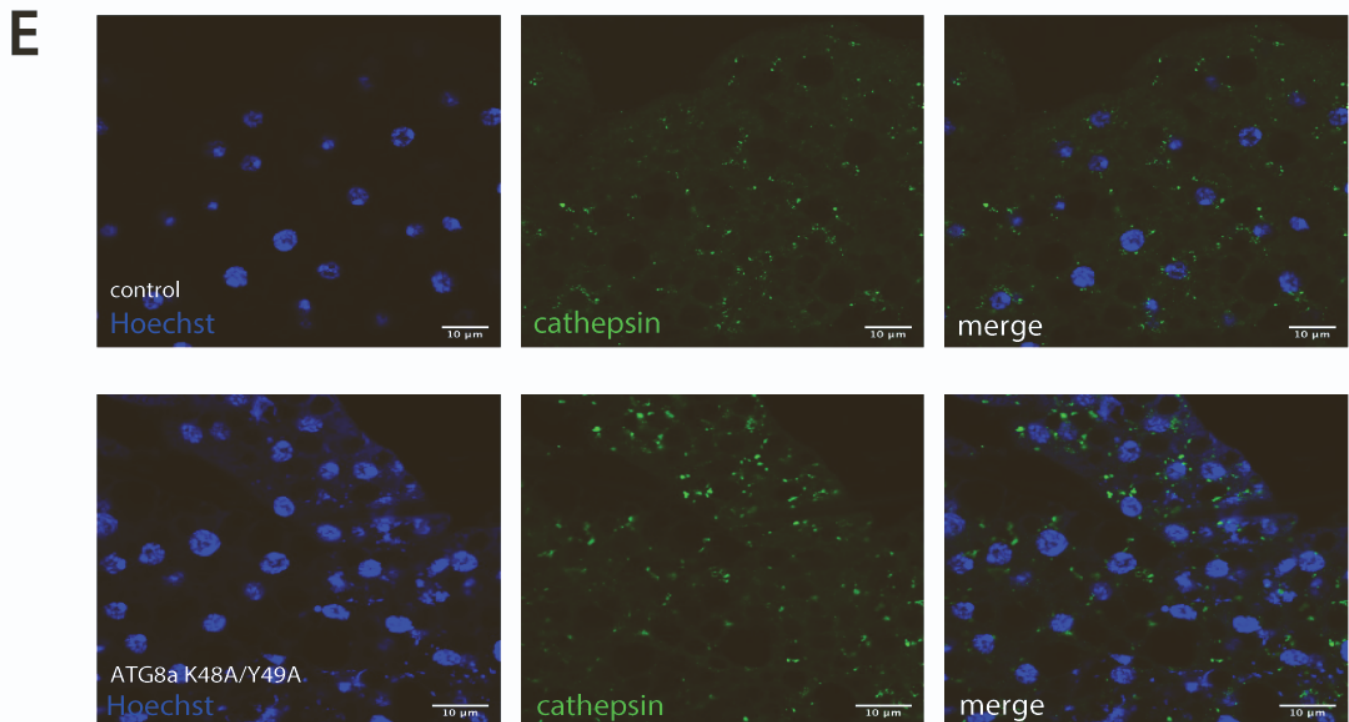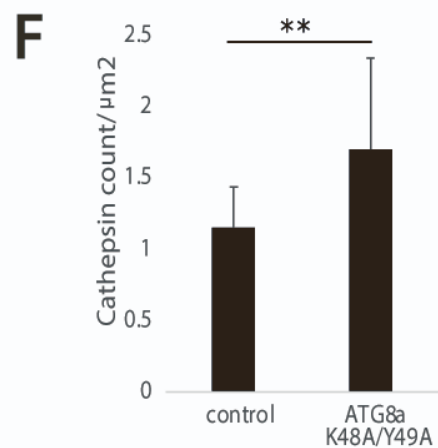

**Supplementary Figure 1 (Related to Figure 1). Characterization of Atg8a<sup>K48A/Y49A</sup> mutants.**

**(A)** Schematics showing the generation of Atg8a<sup>K48A/Y49A</sup> mutant flies using CRISPR. **(B)** Western blots showing expression of Atg8a. Expression of Atg8a protein can be seen in the wild type flies (WT) as well as the Atg8a<sup>K48A/Y49A</sup> mutants. This shows Atg8a is successfully being expressed in the Atg8a CRISPR mutant flies. Atg8a<sup>KG07569</sup> flies were used as a negative control as there was no expression of Atg8a. There is also no expression of Atg8a in the Exon2 line prior to excision which is expected as the selectable marker must first be excised before proper expression can take place. **(C)** Western blots showing Ref(2)P accumulation in Atg8a<sup>KG07569</sup>, Atg8a<sup>K48A/Y49A</sup> and Atg8a<sup>KG07569</sup>/Atg8a<sup>K48A/Y49A</sup> trans-heterozygous flies. **(D)** Western blot showing rescue of Ref(2)P accumulation in Atg8a<sup>K48A/Y49A</sup> flies with co-expression of 3xmCherry-Atg8a. **(E-F)** Cathepsin L staining of adult fat body in starved wild type and Atg8a<sup>K48A/Y49A</sup> mutant flies. Number of biological repeats (N)=3 for all figures.

**A**

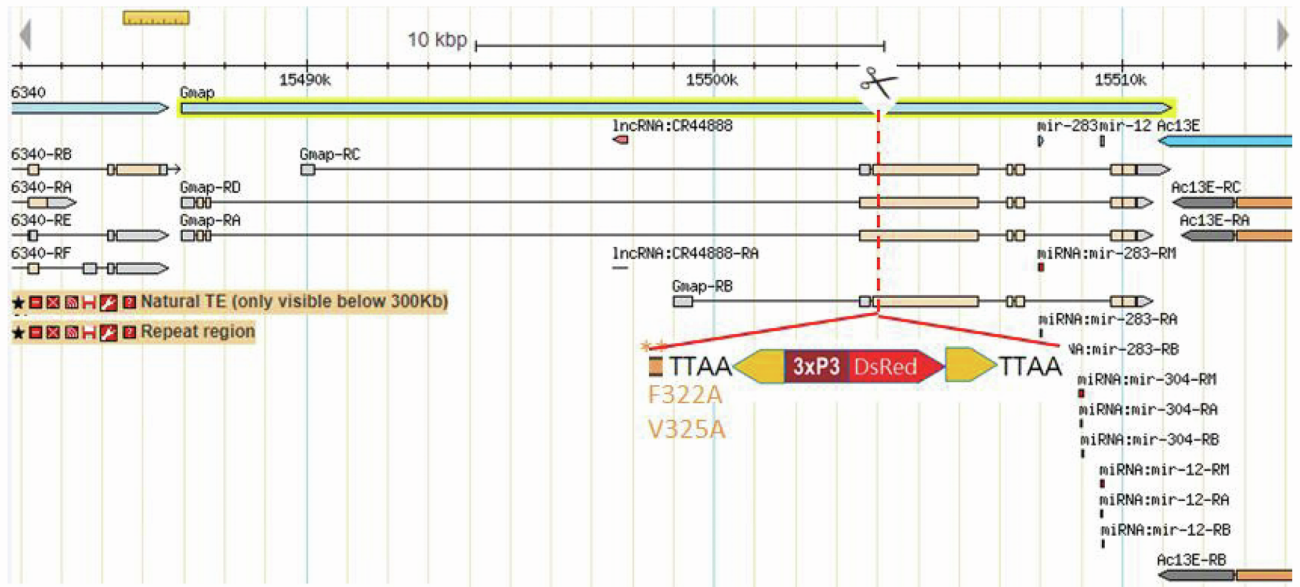

**B**

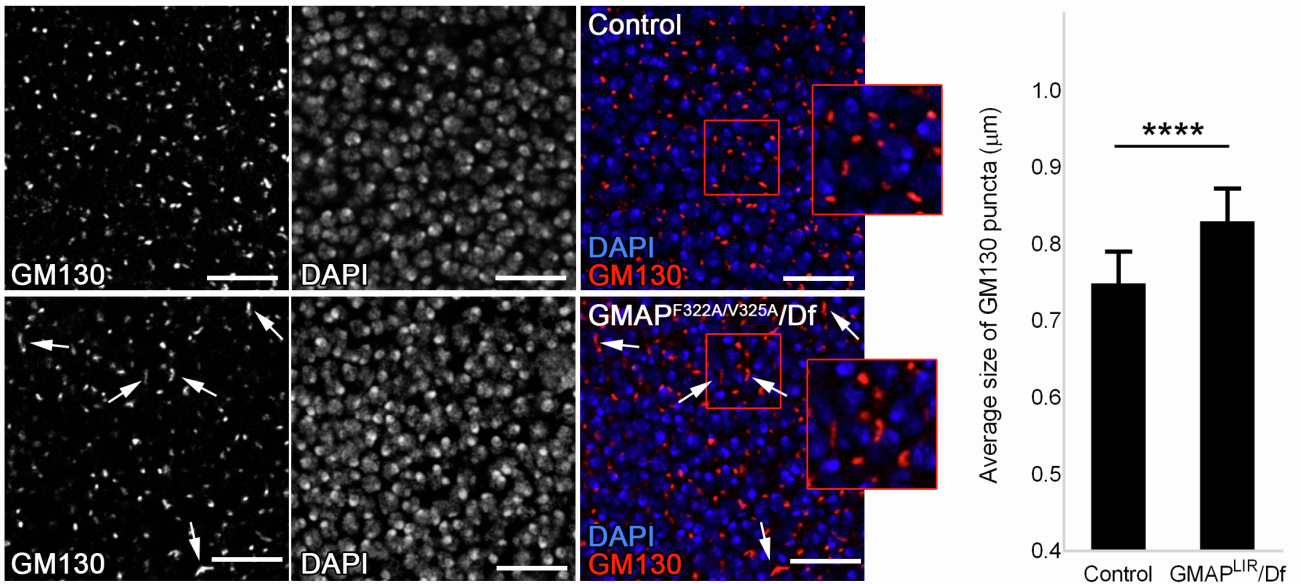

**Supplementary Figure 2 (Related to Figure 5). GMAP<sup>F322A/V325A</sup> mutants exhibit elongated Golgi morphology.**

(A) Schematics showing the generation of GMAP<sup>F322A/V325A</sup> mutant flies using CRISPR. (B) Similarly to GMAP<sup>F322A/V325A</sup> homo/hemizygotes, GMAP<sup>F322A/V325A</sup> /Df trans-heterozygotes show increased Golgi marker (GM130) accumulation and altered Golgi morphology. Images are single confocal planes. Quantification of average size of GM130 puncta. Average GM130 puncta size is larger in GMAP<sup>F322A/V325A</sup> /Df brains was significantly higher than in wild type flies. Bar charts show means  $\pm$  s.d. Statistical significance was determined using two-tailed Student's *t*-test. \*\*\*\* $p < 0.0001$ . Number of biological repeats (N)=3 for all figures. Scale bars: 10  $\mu$ m.

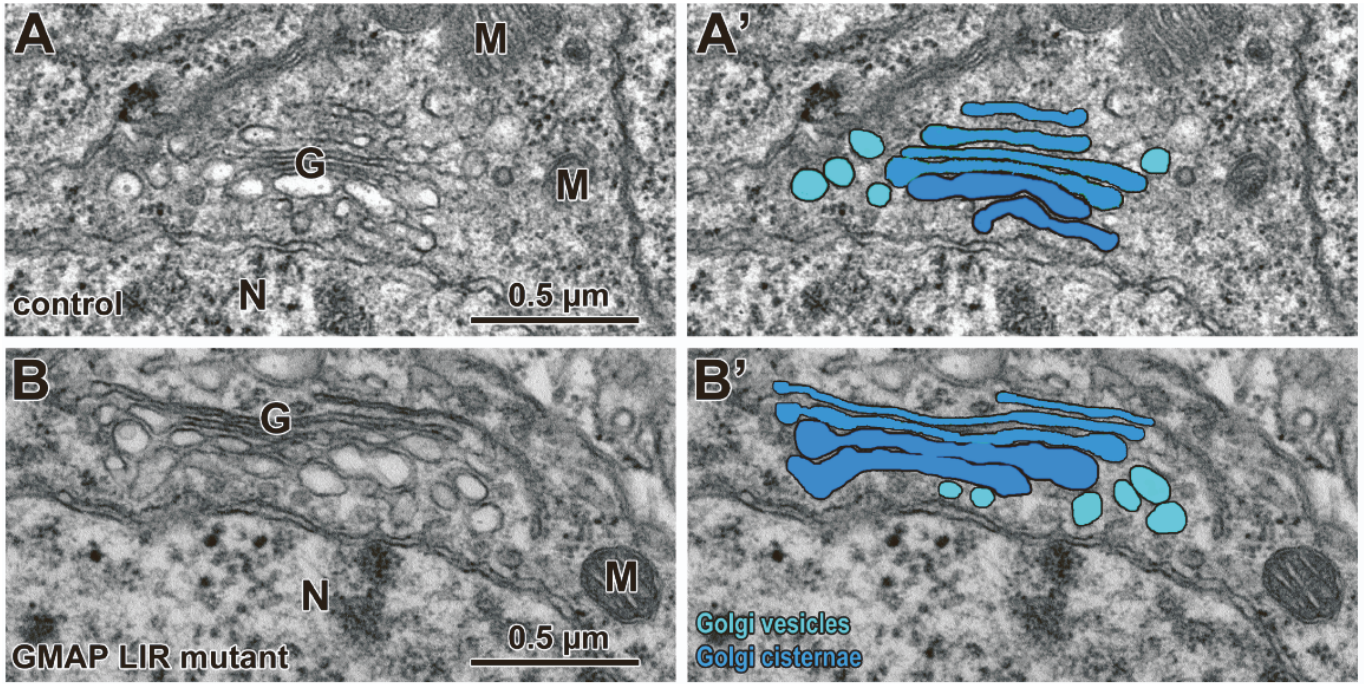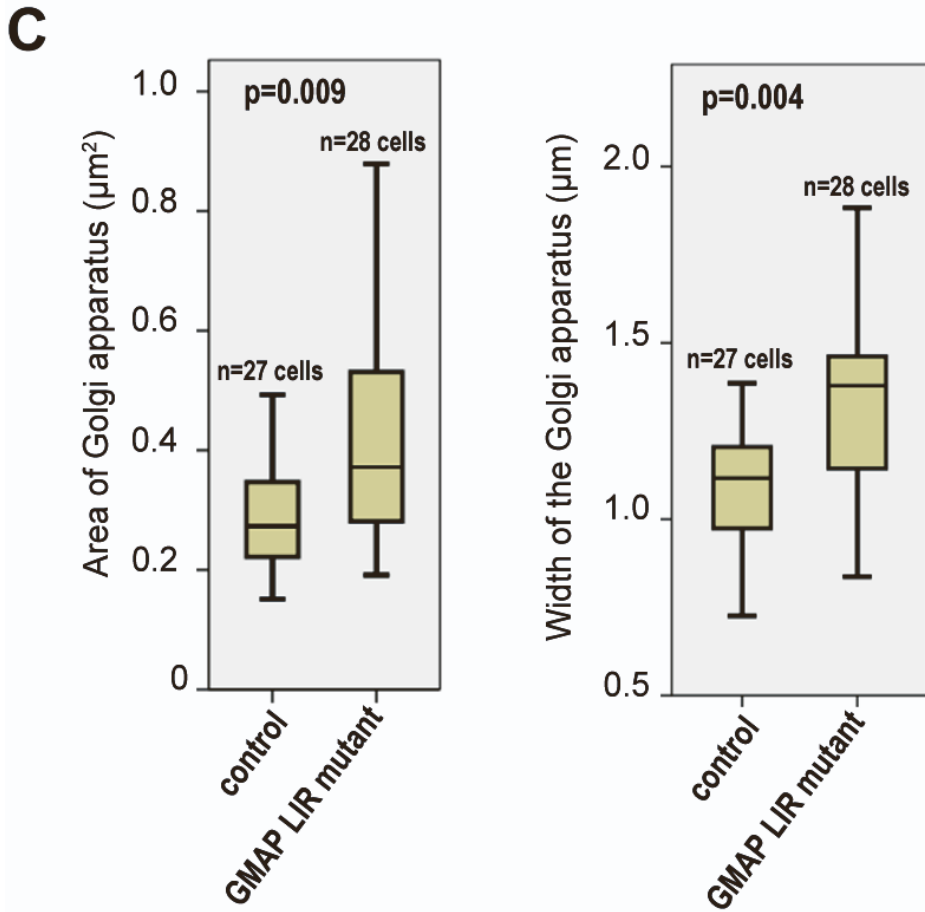

Supplementary Figure 3

**Supplementary Figure 3 (Related to Figure 5). GMAP<sup>F322A/V325A</sup> mutants exhibit elongated Golgi morphology.**

Electron micrographs of adult neurons of control (A) and GMAP<sup>F322A/V325A</sup> mutants (B). Enlarged Golgi cisternae are readily apparent in mutants compared to control (A-C). Abbreviations: Golgi (G), Nucleus (N), Mitochondria (M). (N=27 for control and N=28 for mutants). Scale bars: 0.5  $\mu$ m.

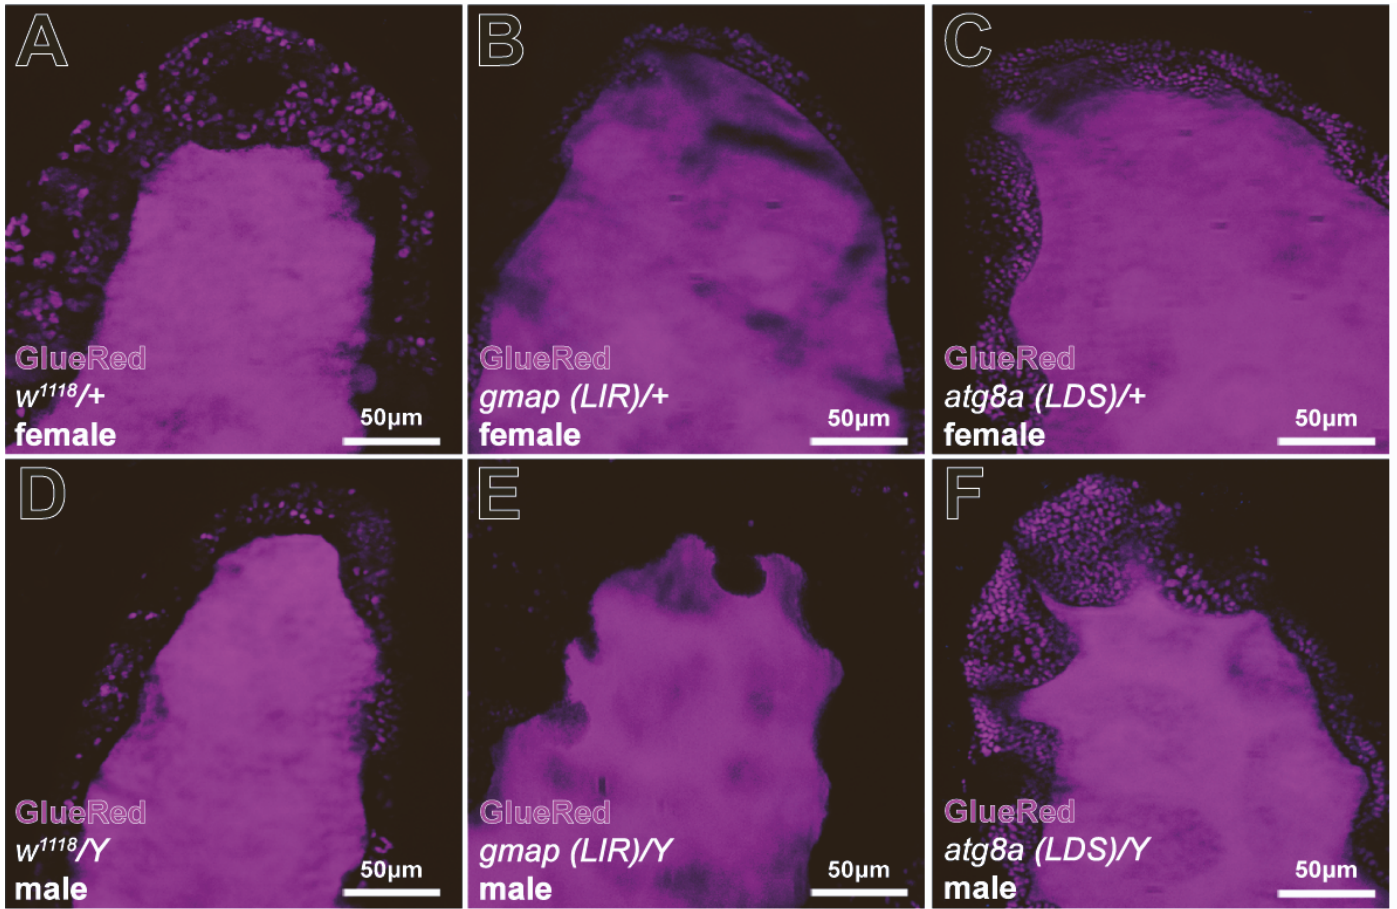

Supplementary Figure 4



**Supplementary Figure 4 (Related to Figure 5). GMAP<sup>F322A/V325A</sup> mutants do not exhibit secretion defects.**

The salivary gland-specific (*sgs3* promoter-driven) *sgs3*-DsRed reporter was crossed into the genotypes shown in the images. White prepupal salivary glands are visible in all image panels, and the secreted glue clearly fills the lumen in all cases, with residual granules remaining in cells (but its amount is very variable even in controls). Thus, there is no indication of a secretory defect in GMAP<sup>F322A/V325A</sup> mutants. Number of biological repeats (N)=3 for all figures.

Genotypes: A: w<sup>1118</sup>/+ ; P{Sgs3-DsRed}/+ ; +/+

B: GMAP LIR: GMAP<sup>F322A/V325A</sup>/+; P{Sgs3-DsRed}/+ ; +/+

C: Atg8a LDS: Atg8a<sup>K48A/Y49A</sup>/+; P{Sgs3-DsRed}/+ ; +/+

D: w<sup>1118</sup>/Y ; P{Sgs3-DsRed}/+ ; +/+

E: GMAP LIR: GMAP<sup>F322A/V325A</sup>/Y; P{Sgs3-DsRed}/+ ; +/+

F: Atg8a LDS: Atg8a<sup>K48A/Y49A</sup>/Y; P{Sgs3-DsRed}/+ ; +/+

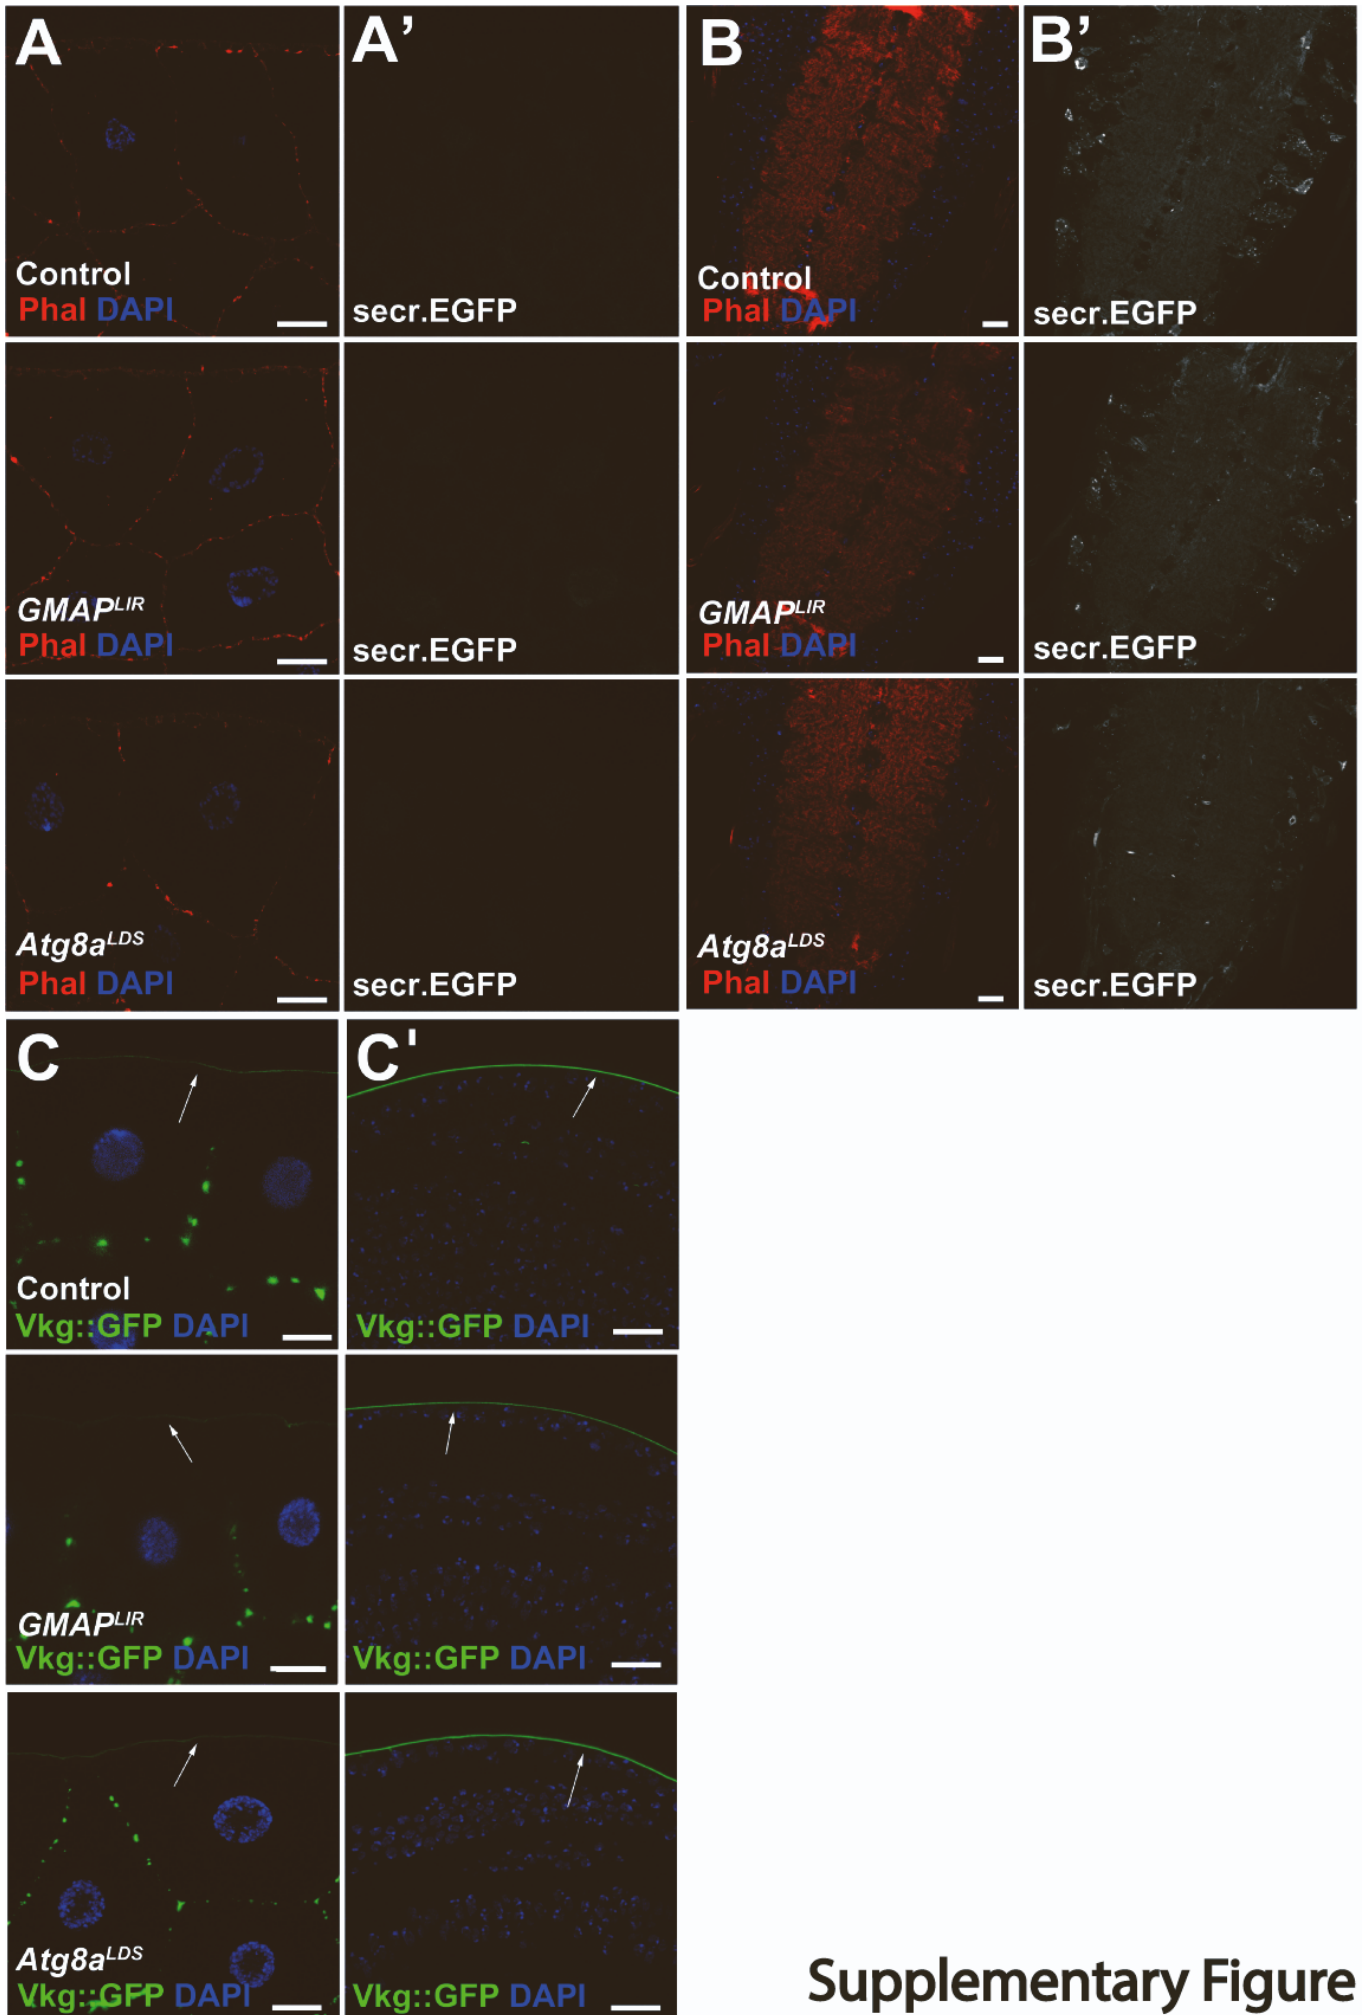

Supplementary Figure 5

**Supplementary Figure 5 (Related to Figure 5). GMAP<sup>F322A/V325A</sup> mutants do not exhibit secretion defects.**

(A-B) Fluorescent images show that GMAP<sup>F322A/V325A</sup> and Atg8a<sup>K48A/Y49A</sup> mutations do not cause retention of the ubiquitously expressed secr.EGFP secretion reporter in the larval adipose tissue (A) and the larval ventral nerve cord (B). Tissues were counterstained with Phalloidin.

(C) GMAP<sup>F322A/V325A</sup> or Atg8a<sup>K48A/Y49A</sup> did not perturb Collagen IV secretion or caused intracellular retention in the larval adipose tissue (C), or in the wing imaginal disc (C').

Collagen IV is distinguished by the localization of the Vkg::GFP fusion protein. Arrows indicate the basement membranes. Scale bars: 20 μm. Number of biological repeats (N)=3 for all figures. Genotypes: A-B) w<sup>1118</sup>/Y; UAS-secr.EGFP/+; tub-GAL4/+, GMAP<sup>F322A/V325A</sup>/Y; UAS-secr.EGFP/+; tub-GAL4/+, Atg8a<sup>K48A/Y49A</sup>/Y; UAS-secr.EGFP/+; tub-GAL4/+. C)

w<sup>1118</sup>/Y;P{PTT-un}vkg<sup>G00454</sup>/+,GMAP<sup>F322A/V325A</sup>/Y;P{PTT-un}vkg<sup>G00454</sup>/+,

Atg8a<sup>K48A/Y49A</sup>/Y; P{PTT-un}vkg<sup>G00454</sup>/+.

**Supplementary Table S2.** The expression level of 29 proteins in mutant *Drosophila* was higher than that in wild type *Drosophila*. The proteins are listed by accession number in uniprot, number of protein and peptides, and LFQ (label-free quantification) intensity. These 29 proteins were screened using the following conditions: ratio > 2 and p value < 0.5.

| Fasta headers                                                                                       | Number of proteins | Peptides | Razor + unique peptides | LFQ intensity Atg8a1 | LFQ intensity Atg8a2 | LFQ intensity Atg8a3 | LFQ intensity Atg8a4 | LFQ intensity ATG8a <sup>4RA/Y6A</sup> 1 | LFQ intensity ATG8a <sup>4RA/Y6A</sup> 2 | LFQ intensity ATG8a <sup>4RA/Y6A</sup> 3 | LFQ intensity ATG8a <sup>4RA/Y6A</sup> 4 | LFQ intensity WT1 | LFQ intensity WT2 | LFQ intensity WT3 | LFQ intensity WT4 | Average LFQ intensity of Atg8a | Average LFQ intensity of ATG8a <sup>4RA/Y6A</sup> | Average LFQ intensity of WT | Ratio Atg8a/WT | Ratio ATG8a <sup>4RA/Y6A</sup> /WT | p value Atg8a/WT | p value ATG8a <sup>4RA/Y6A</sup> /WT | preferred name | LIR motif P Anchor |     |
|-----------------------------------------------------------------------------------------------------|--------------------|----------|-------------------------|----------------------|----------------------|----------------------|----------------------|------------------------------------------|------------------------------------------|------------------------------------------|------------------------------------------|-------------------|-------------------|-------------------|-------------------|--------------------------------|---------------------------------------------------|-----------------------------|----------------|------------------------------------|------------------|--------------------------------------|----------------|--------------------|-----|
| tr Q7K3E2Q7K3E2_DROME CG5080, isoform A OS=Drosophila melanogaster GN=CT16297 PE=1 SV=1             | 1                  | 22       | 22                      | 4.2E+07              | 9.4E+07              | 7E+07                | 5.9E+07              | 67436000                                 | 58255000                                 | 29043000                                 | 44595000                                 | 1.7E+07           | 2.2E+07           | 3.6E+07           | 2.4E+07           | 66049000                       | 49880000                                          | 24680750                    | 2.6761342      | 2.021008276                        | 0.01159296       | 0.03557181                           | CG5080         | YES                | NO  |
| tr A0A0B4K6W2A0A0B4K6W2_DROME Fat factors, isoform F OS=Drosophila melanogaster GN=fat PE=3 SV=3    | 18                 | 18       | 18                      | 8577700              | 9016300              | 1.1E+07              | 1.1E+07              | 0                                        | 8668200                                  | 7359000                                  | 11604000                                 | 0                 | 0                 | 0                 | 0                 | 10005750                       | 6905775                                           | 0                           | #DIV/0!        | #DIV/0!                            | 7.5782E-06       | 0.031221334                          | fat            | YES                | NO  |
| tr Q6HY5Q6HY5_DROME HDC0031 OS=Drosophila melanogaster GN=DmelCG34172 PE=1 SV=1                     | 1                  | 2        | 2                       | 1.1E+08              | 7E+07                | 7.1E+07              | 6.4E+07              | 103160000                                | 87701000                                 | 69298000                                 | 0                                        | 0                 | 0                 | 0                 | 78076250          | 65039750                       | 0                                                 | #DIV/0!                     | #DIV/0!        | 0.00020042                         | 0.028880452      | CG34172                              | NO             | NO                 |     |
| tr Q8R72Q8R72_DROME F19011p1 OS=Drosophila melanogaster GN=CG2638-RB PE=1 SV=2                      | 1                  | 3        | 3                       | 1.2E+08              | 0                    | 9E+07                | 7.8E+07              | 61743000                                 | 68465000                                 | 60786000                                 | 0                                        | 0                 | 0                 | 0                 | 71748250          | 47748500                       | 0                                                 | #DIV/0!                     | #DIV/0!        | 0.03018376                         | 0.024545484      | CG2638                               | NO             | NO                 |     |
| tr Q9VDU7Q9VDU7_DROME LD05707p OS=Drosophila melanogaster GN=Nam PE=2 SV=3                          | 1                  | 7        | 7                       | 1.4E+07              | 1.5E+07              | 1.5E+07              | 1.2E+07              | 11364000                                 | 13020000                                 | 13020000                                 | 1.3E+07                                  | 0                 | 0                 | 0                 | 13968250          | 12606750                       | 3127500                                           | 4.446267                    | 4.630935252    | 0.01460055                         | 0.02437065       | Nam                                  | NO             | NO                 |     |
| tr Q9VLV9Q9VLV9_DROME Proctolin OS=Drosophila melanogaster GN=Proc PE=2 SV=2                        | 1                  | 2        | 2                       | 8705600              | 1.2E+07              | 8385500              | 8736000              | 6878200                                  | 4526400                                  | 7787400                                  | 4594800                                  | 3536500           | 3237600           | 3024800           | 0                 | 499525                         | 5946700                                           | 2449725                     | 3.8777924      | 2.427496964                        | 0.00115312       | 0.023807031                          | Proc           | NO                 | NO  |
| tr A0A0B4KEK7A0A0B4KEK7_DROME P131, isoform D OS=Drosophila melanogaster GN=P131 PE=4 SV=1a,2       | 4                  | 4        | 4                       | 1.1E+07              | 1.8E+07              | 1.8E+07              | 1.2E+07              | 14105000                                 | 17153000                                 | 16649000                                 | 14322000                                 | 1E+07             | 0                 | 1E+07             | 8975700           | 15120500                       | 15552750                                          | 7441175                     | 2.0320044      | 2.090698042                        | 0.04979791       | 0.021273536                          | P131           | YES                | NO  |
| tr Q9VIX4Q9VIX4_DROME Acyl-coenzyme A oxidase OS=Drosophila melanogaster GN=DmelCG17544 PE=1        | 1                  | 20       | 20                      | 4.9E+07              | 4.3E+07              | 7.8E+07              | 8.9E+07              | 24183000                                 | 27366000                                 | 17354000                                 | 49323000                                 | 5441200           | 8901300           | 5936100           | 8904100           | 64562500                       | 29556500                                          | 7295675                     | 8.8494211      | 4.051235835                        | 0.00210498       | 0.018795974                          | CG17544        | YES                | NO  |
| tr Q9VZF1Q9VZF1_DROME CG1309 OS=Drosophila melanogaster GN=DmelCG1309 PE=1 SV=1                     | 1                  | 9        | 9                       | 1.6E+07              | 1.8E+07              | 1.6E+07              | 2.4E+07              | 15907000                                 | 23462000                                 | 16287000                                 | 13676000                                 | 9482300           | 1E+07             | 0                 | 0                 | 18514250                       | 17333000                                          | 4914325                     | 3.7674045      | 3.527035758                        | 0.0077624        | 0.021796017                          | CG1309         | NO                 | NO  |
| tr P02515H1P22_DROME Heat shock protein 22 OS=Drosophila melanogaster GN=Hsp22 PE=1 SV=4            | 1                  | 9        | 9                       | 1.1E+08              | 1.4E+08              | 5.8E+07              | 9.8E+07              | 17198000                                 | 14414000                                 | 9968500                                  | 0                                        | 7825500           | 0                 | 6437400           | 102654000         | 15283625                       | 3565725                                           | 28789906                    | 4.286260157    | 0.00137242                         | 0.00707916       | Hsp22                                | YES            | NO                 |     |
| tr A0A0B4HEJ2A0A0B4HEJ2_DROME RIC-3, isoform Y OS=Drosophila melanogaster GN=RIC-3 PE=4 SV=1        | 15                 | 8        | 8                       | 1.8E+07              | 1.7E+07              | 1.8E+07              | 1.4E+07              | 24466000                                 | 16900000                                 | 22980000                                 | 21190000                                 | 0                 | 1.5E+07           | 0                 | 0                 | 16832750                       | 21163500                                          | 3699000                     | 4.5506218      | 5.721411192                        | 0.01534687       | 0.004547873                          | RIC-3          | NO                 | NO  |
| tr Q9VGE7Q9VGE7_DROME Beta-galactosidase OS=Drosophila melanogaster GN=Ec3 PE=1 SV=1                | 1                  | 9        | 9                       | 2.2E+07              | 1.6E+07              | 1.7E+07              | 1.5E+07              | 25924000                                 | 27301000                                 | 20987000                                 | 16756000                                 | 1.2E+07           | 7952400           | 9202500           | 0                 | 17569000                       | 22742000                                          | 7319475                     | 2.4003088      | 3.107053443                        | 0.01395916       | 0.004700721                          | Ec3            | NO                 | NO  |
| tr Q7K3B7Q7K3B7_DROME LD40177p OS=Drosophila melanogaster GN=CG11208 PE=1 SV=1                      | 1                  | 14       | 14                      | 3.8E+07              | 1.8E+07              | 3.5E+07              | 3.7E+07              | 21592000                                 | 20363000                                 | 24913000                                 | 28255000                                 | 1.2E+07           | 9489700           | 0                 | 0                 | 31894750                       | 23780750                                          | 5412925                     | 5.8923318      | 4.393327083                        | 0.00300544       | 0.002326007                          | CG11208        | YES                | NO  |
| tr Q7K5M6Q7K5M6_DROME GH04176p OS=Drosophila melanogaster GN=Sip1 PE=1 SV=1                         | 1                  | 9        | 9                       | 1.7E+07              | 1.2E+07              | 1.4E+07              | 1.2E+07              | 10023000                                 | 12230000                                 | 15515000                                 | 12410000                                 | 0                 | 0                 | 0                 | 6741300           | 13654500                       | 12544500                                          | 1685325                     | 8.1019981      | 7.443371457                        | 0.00147858       | 0.001739584                          | Sip1           | NO                 | YES |
| tr Q9VGV7GSTD3_DROME Inactive glutathione S-transferase D3 OS=Drosophila melanogaster GN=GstD3 PE=1 | 1                  | 7        | 7                       | 1.8E+07              | 1.8E+07              | 3.1E+07              | 2.7E+07              | 14837000                                 | 19676000                                 | 27681000                                 | 20322000                                 | 0                 | 6126200           | 0                 | 0                 | 23691500                       | 20629000                                          | 1531550                     | 15.468969      | 13.4693611                         | 0.00094562       | 0.000784903                          | GstD3          | YES                | NO  |
| tr Q3XQ2Q3XQ2_DROME Division abnormally delayed, isoform B OS=Drosophila melanogaster GN=Haly PE=2  | 1                  | 7        | 7                       | 6447800              | 5766200              | 7550500              | 5899000              | 6542700                                  | 8157700                                  | 5551100                                  | 3985100                                  | 0                 | 0                 | 0                 | 6415900           | 6058650                        | 0                                                 | #DIV/0!                     | #DIV/0!        | 4.0691E-06                         | 0.00449452       | daly                                 | YES            | YES                |     |
| tr Q9VBU6Q9VBU6_DROME RE24638p OS=Drosophila melanogaster GN=CG11857 PE=1 SV=1                      | 1                  | 6        | 6                       | 6.2E+07              | 7.6E+07              | 7.1E+07              | 6.2E+07              | 53529000                                 | 56704000                                 | 65897000                                 | 51294000                                 | 3.1E+07           | 3.2E+07           | 2.4E+07           | 2.5E+07           | 67521500                       | 56856000                                          | 28036750                    | 2.4083212      | 2.027909797                        | 6.9108E-05       | 0.000258626                          | CG11857        | YES                | NO  |
| tr P14199REF2P_DROME Protein ref(2)P OS=Drosophila melanogaster GN=ref(2)P PE=1 SV=2                | 1                  | 17       | 17                      | 4.6E+08              | 5.6E+08              | 3.9E+08              | 3.5E+08              | 87102000                                 | 68651000                                 | 87945000                                 | 51836000                                 | 7243400           | 3432200           | 4237200           | 2699400           | 439115000                      | 73885500                                          | 4403050                     | 99.729733      | 16.7800729                         | 9.4014E-05       | 0.000198945                          | ref(2)P        | YES                | YES |
| tr Q9VUI7DPM1_DROME Probable diacylglycerol phosphatase OS=Drosophila melanogaster GN=C1            | 1                  | 5        | 5                       | 1.6E+07              | 1.5E+07              | 1.6E+07              | 1.7E+07              | 16092000                                 | 13953000                                 | 17980000                                 | 9821500                                  | 0                 | 0                 | 0                 | 16126750          | 14461625                       | 0                                                 | #DIV/0!                     | #DIV/0!        | 1.2987E-08                         | 0.000170861      | CG10166                              | YES            | NO                 |     |
| tr Q9V3Q1Q9V3Q1_DROME GM14286p OS=Drosophila melanogaster GN=Pdp PE=1 SV=1                          | 1                  | 9        | 9                       | 0                    | 1.3E+07              | 6948500              | 9111500              | 6744100                                  | 8983800                                  | 8088400                                  | 5764200                                  | 0                 | 0                 | 0                 | 0                 | 7283250                        | 7405125                                           | 0                           | #DIV/0!        | #DIV/0!                            | 0.03759869       | 4.52877E-05                          | Pdp            | YES                | NO  |
| tr Q9VXL2Q9VXL2_DROME Gsp microtubule-associated protein, isoform A OS=Drosophila melanogaster GN=2 | 21                 | 21       | 21                      | 2.8E+07              | 2.4E+07              | 1.8E+07              | 1.5E+07              | 13660000                                 | 11066000                                 | 15479000                                 | 10335000                                 | 0                 | 0                 | 0                 | 21619000          | 12620000                       | 0                                                 | #DIV/0!                     | #DIV/0!        | 0.00030631                         | 4.20151E-05      | Gsp                                  | YES            | YES                |     |
| tr M9PCN6M9PCN6_DROME Numb, isoform D OS=Drosophila melanogaster GN=NumB PE=4 SV=1                  | 1                  | 6        | 6                       | 8211600              | 1.2E+07              | 9367700              | 7753400              | 6065800                                  | 8246400                                  | 8399600                                  | 6404500                                  | 0                 | 0                 | 0                 | 9419675           | 7279075                        | 0                                                 | #DIV/0!                     | #DIV/0!        | 9.7701E-05                         | 2.04783E-05      | numB                                 | NO             | NO                 |     |
| tr Q9V92Q9V92_DROME Glutathione S-transferase D8 OS=Drosophila melanogaster GN=GstD8 PE=2 SV=1      | 1                  | 6        | 6                       | 8031500              | 8481800              | 7199800              | 6258700              | 7957600                                  | 9058900                                  | 11393000                                 | 8589400                                  | 0                 | 0                 | 0                 | 7492950           | 9249725                        | 0                                                 | #DIV/0!                     | #DIV/0!        | 4.9191E-06                         | 1.72223E-05      | GstD8                                | YES            | NO                 |     |
| tr Q9V39Q9V39_DROME CG9775, isoform A OS=Drosophila melanogaster GN=CG9775 PE=1 SV=1                | 2                  | 5        | 5                       | 5332800              | 8418600              | 0                    | 4784100              | 6151200                                  | 6067800                                  | 7774500                                  | 5663000                                  | 0                 | 0                 | 0                 | 4383875           | 6414125                        | 0                                                 | #DIV/0!                     | #DIV/0!        | 0.0130612                          | 9.12257E-06      | CG9775                               | NO             | YES                |     |
| tr A1Z869A1Z869_DROME Glutathione S-transferase F4 OS=Drosophila melanogaster GN=GstF4 PE=3 SV=1    | 1                  | 9        | 9                       | 1.1E+08              | 1.2E+08              | 8E+07                | 9.4E+07              | 149890000                                | 152980000                                | 141210000                                | 123420000                                | 4.5E+07           | 4E+07             | 4.8E+07           | 4.8E+07           | 100038250                      | 141875000                                         | 45458750                    | 2.2006379      | 3.120961311                        | 0.00085178       | 8.33344E-06                          | GstE4          | YES                | NO  |
| tr A4V488A4V488_DROME Inosine-5-monophosphate dehydrogenase OS=Drosophila melanogaster GN=ras PE=2  | 7                  | 7        | 7                       | 1.2E+07              | 0                    | 7820000              | 7853100              | 11928000                                 | 9137300                                  | 9035200                                  | 9516500                                  | 0                 | 0                 | 0                 | 6902075           | 9904250                        | 0                                                 | #DIV/0!                     | #DIV/0!        | 0.03256616                         | 6.71240E-06      | ras                                  | YES            | YES                |     |
| tr A0A0B4JD21A0A0B4JD21_DROME Alkylglyoxylase-phosphate synthase OS=Drosophila melanogaster GN=A12  | 8                  | 8        | 8                       | 1.9E+07              | 1.6E+07              | 1.8E+07              | 1.8E+07              | 10879000                                 | 12045000                                 | 13933000                                 | 14633000                                 | 0                 | 0                 | 0                 | 0                 | 17562750                       | 12875000                                          | 0                           | #DIV/0!        | #DIV/0!                            | 1.5408E-07       | 5.61398E-06                          | CG10253        | NO                 | NO  |
| tr Q86BQ3Q86BQ3_DROME Uncharacterized protein, isoform A OS=Drosophila melanogaster GN=DmelCG13213  | 8                  | 8        | 7                       | 1.1E+07              | 8370200              | 9259500              | 7679400              | 9506100                                  | 8262800                                  | 10817000                                 | 8498500                                  | 0                 | 0                 | 0                 | 9120525           | 9271100                        | 0                                                 | #DIV/0!                     | #DIV/0!        | 1.9801E-05                         | 3.86807E-06      | CG13284                              | YES            | NO                 |     |
| tr A0A0B4LGN1A0A0B4LGN1_DROME Inositol 1,4,5-tris-phosphate receptor, isoform C OS=Drosophila melan | 2                  | 18       | 18                      | 7885300              | 8429100              | 8443700              | 8662700              | 7844000                                  | 7670100                                  | 7321500                                  | 8500400                                  | 0                 | 0                 | 0                 | 0                 | 8355075                        | 7834000                                           | 0                           | #DIV/0!        | #DIV/0!                            | 4.04E-09         | 6.57104E-08                          | Insr-83A       | YES                | NO  |

**Supplementary Table 2 (Related to Figure 2). List of proteins that significantly accumulate in Atg8a<sup>KG07569</sup> and Atg8a<sup>K48A/Y49A</sup> mutants.**

Results showing the expression level of 29 proteins that are upregulated in Atg8a<sup>KG07569</sup> and Atg8a<sup>K48A/Y49A</sup> mutants. The proteins are listed by accession number in Uniprot, number of protein and peptides, and LFQ (label-free quantification) intensity. These 29 proteins were screened using the following conditions: ratio > 2 and p value < 0.5.
